# Supplementary material for: Gsmtx4 Alleviated Osteoarthritis through Piezo1/Calcineurin/NFAT1 Signaling Axis under Excessive Mechanical Strain
Source: MDPI journal article supplement (doi:10.3390/ijms24044022), 2023-02-16
Supplement: s1 [file s1]

## Supplementary Materials

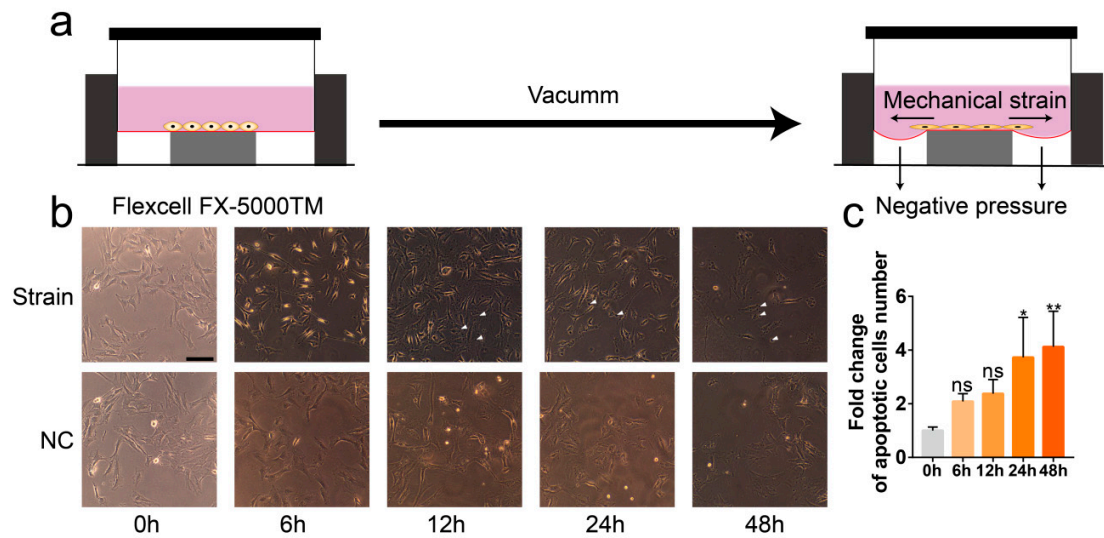

**Figure S1.** Morphological changes of chondrocytes under mechanical strain. **(a)** A schematic diagram of the mechanical strain treatment on chondrocytes. **(b)** The morphological characteristics of chondrocytes undergoing mechanical strain. **(c)** Quantified analysis of apoptotic chondrocytes ( $n=3$ ). \*,  $p < 0.05$  vs NC; \*\*,  $p < 0.01$  vs NC; ns, no significant differences. one-way ANOVA with Bonferroni's test for **(c)**. Scale bar:  $100\mu\text{m}$ .

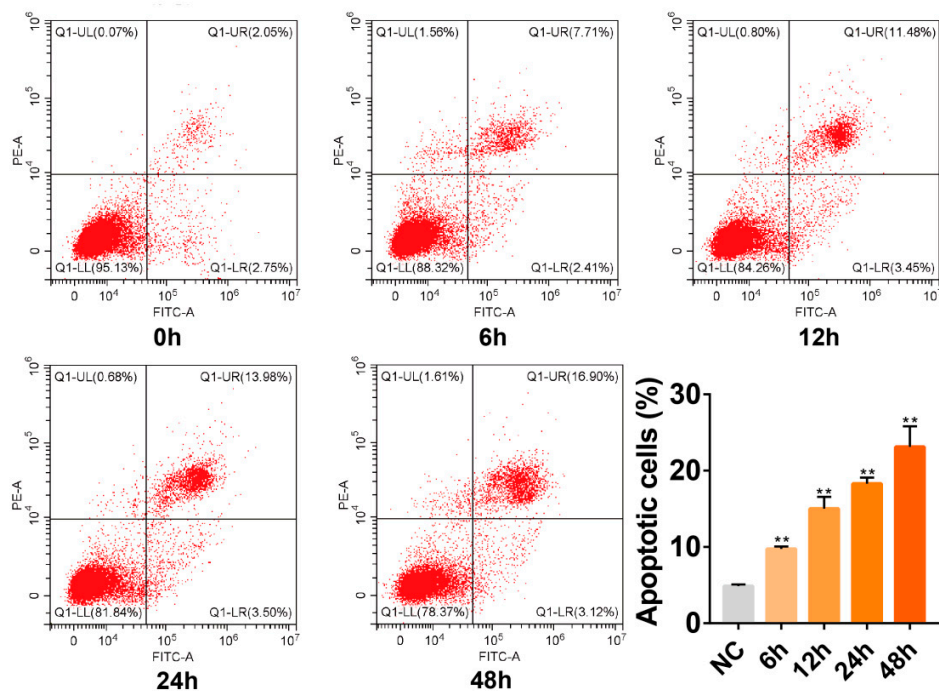

**Figure S2.** Flow cytometry analysis of chondrocyte stained with Annexin V-FITC and PI ( $n=3$ ). \*\*,  $p < 0.01$  vs NC. one-way ANOVA with Bonferroni's test was performed the statistical analysis.

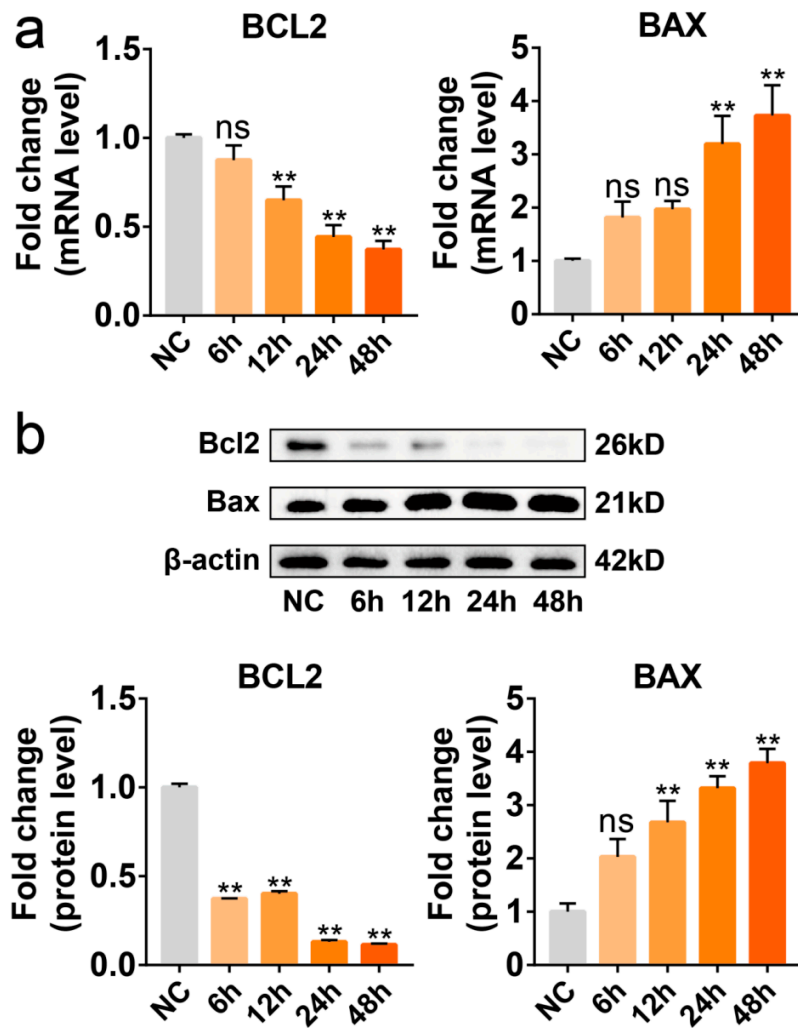

**Figure S3.** Mechanical strain led to apoptosis and anabolic/catabolic imbalance in chondrocytes in a time-dependent manner. **(a)** RT-qPCR analysis of BAX and BCL2 in chondrocytes exposed to mechanical strain ( $n=3$ ). **(b)** Western blots analysis of BAX and BCL2 in chondrocytes exposed to mechanical strain ( $n=3$ ). \*\*,  $p < 0.01$  vs NC; ns, no significant differences. one-way ANOVA with Bonferroni's test for **(a, b)**.

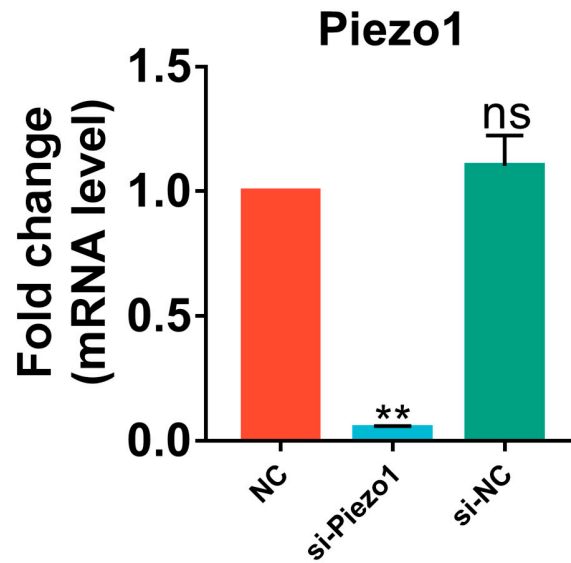

**Figure S4.** The efficiency of si-Piezo1 investigated by qRT-PCR ( $n=3$ ). \*\*,  $p < 0.01$  vs NC; ns, no significant differences. one-way ANOVA with Bonferroni's test for the statistical analysis.

Table S1. Clinical information of human samples

| I<br>D | Age | Gender | Surgical site               | ICRS                     |
|--------|-----|--------|-----------------------------|--------------------------|
| 1      | 70  | F      | Right knee and<br>Left knee | Intact: I<br>Damaged: IV |
| 2      | 68  | F      | Right knee                  | Intact: I<br>Damaged: IV |
| 3      | 82  | F      | Left knee                   | Intact: I<br>Damaged: IV |
| 4      | 73  | F      | Left knee                   | Intact: I<br>Damaged: IV |
| 5      | 59  | R      | Right knee                  | Intact: I<br>Damaged: IV |

Table S2. Primer sequences used in this study

| Gene name      | F/R | Sequences 5'-3'        |
|----------------|-----|------------------------|
| $\beta$ -actin | F   | TGCTATGTTGCCCTAGACTTCG |
|                | R   | GTTGGCATAGAGGTCTTTACGG |
| Piezo1         | F   | AGCAAGCAGGCACAAAGGC    |
|                | R   | CGCACAAACTTGCCAACGAC   |

|          |   |                         |
|----------|---|-------------------------|
| Bax      | F | TTTTTGCTACAGGGTTTC      |
|          | R | TTGTTGTCCAGTTCATCG      |
| Bcl2     | F | GAGAGCGTCAACAGGGAG      |
|          | R | GCCAGGAGAAATCAAACA      |
| Mmp3     | F | CATGAACTTGGCCACTCCCT    |
|          | R | TGGGTACCACGAGGACATCA    |
| Mmp13    | F | GCCACCTTCTTCTTGTTGAGTTG |
|          | R | GACTTCTTCAGGATTCCCGCA   |
| AggreCAN | F | AGTGACCCATCTGCTTACCCTG  |
|          | R | CTGCATCTATGTCGGAGGTAGTG |
| Col2a1   | F | GTGTCAAGGGTCACAGAGGTTAC |
|          | R | CGCTCTCACCCCTTCACACCT   |

---
